# Supplementary material for: Triple functionalization of carved N-doped carbon nanoboxes with synergistic trimetallic sulphide for high performance lithium–sulphur batteries
Source: Royal Society of Chemistry journal article supplement (doi:10.1039/d1ta00077b), 2021-01-01
Supplement: d1ta00077b1.pdf [file d1ta00077b1.pdf]

# Supporting Information

## **Triple Functionalization of Carved N-doped Carbon Nanoboxes**

### **with Synergistic Tri-metallic Sulfide for High Performance**

#### **Lithium-Sulfur Batteries**

Yen-Ju Wu, Cheng-Hao Chen, Shin-Hong Lin, Chun-Lung Huang, Yong-Xian Yeh, Jia-Yu Tan, Jing-Ting Su, Cheng-Ting Hsieh, and Shih-Yuan Lu\*

Department of Chemical Engineering, National Tsing Hua University, Hsinchu 30013, Taiwan, ROC.

\*Email: [sylu@mx.nthu.edu.tw](mailto:sylu@mx.nthu.edu.tw)

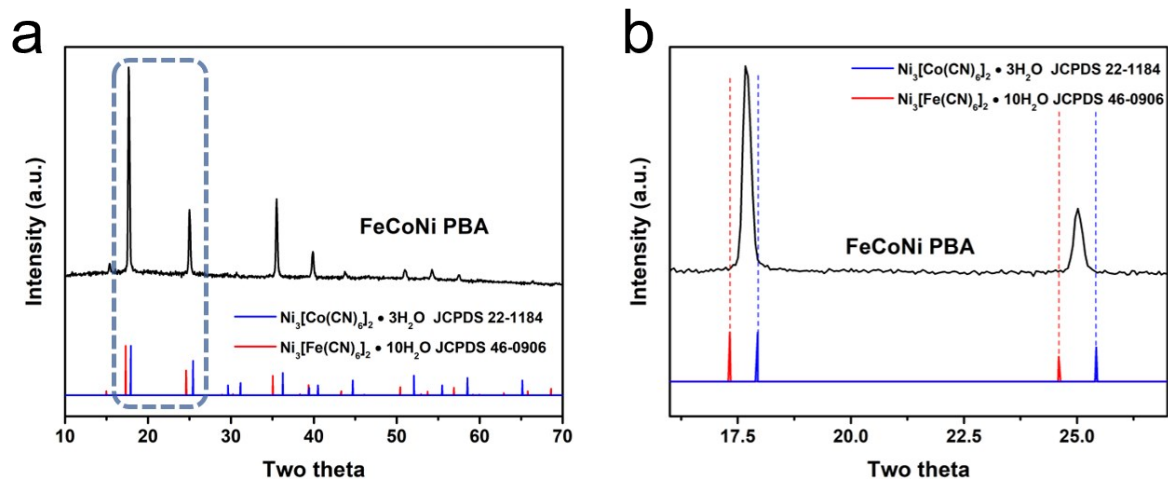

**Figure S1.** (a) XRD pattern of FeCoNi PBA, (b) locally enlarged XRD pattern.

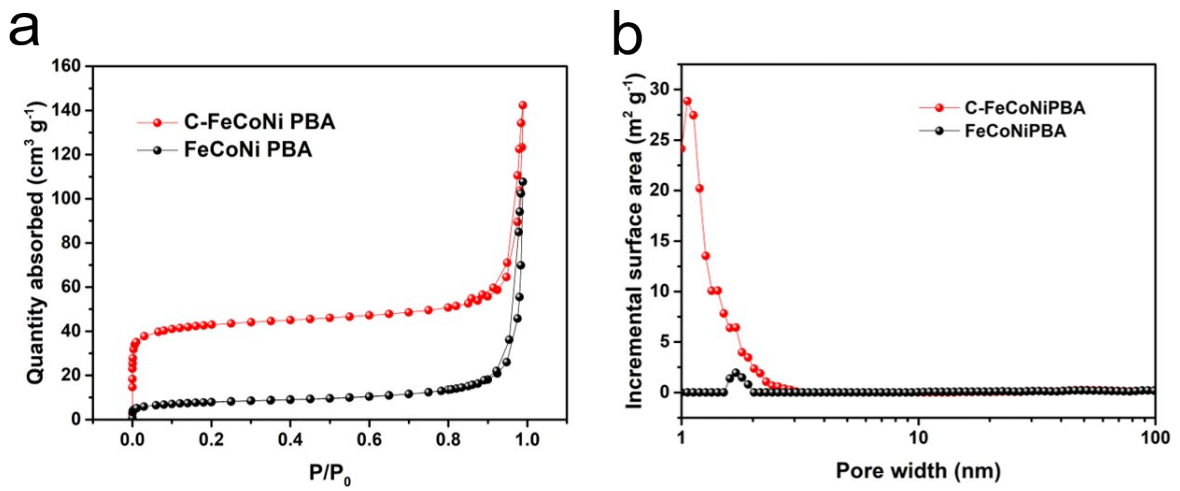

**Figure S2.** (a) N<sub>2</sub> adsorption/desorption isotherms and (b) incremental pore size distributions of C-FeCoNi PBA and FeCoNi PBA.

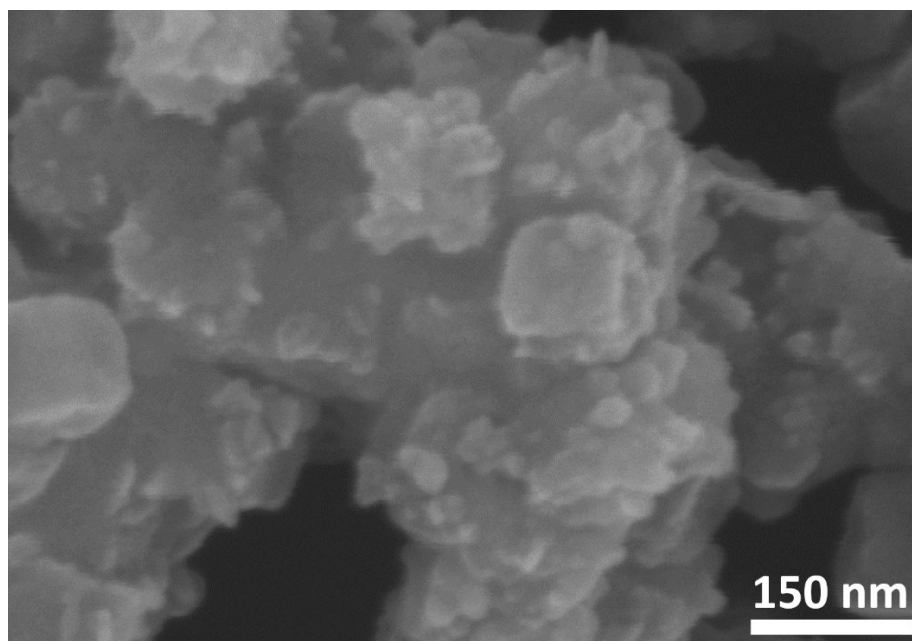

**Figure S3.** SEM image of S-FeCoNi@C-CNB without coating of PDA.

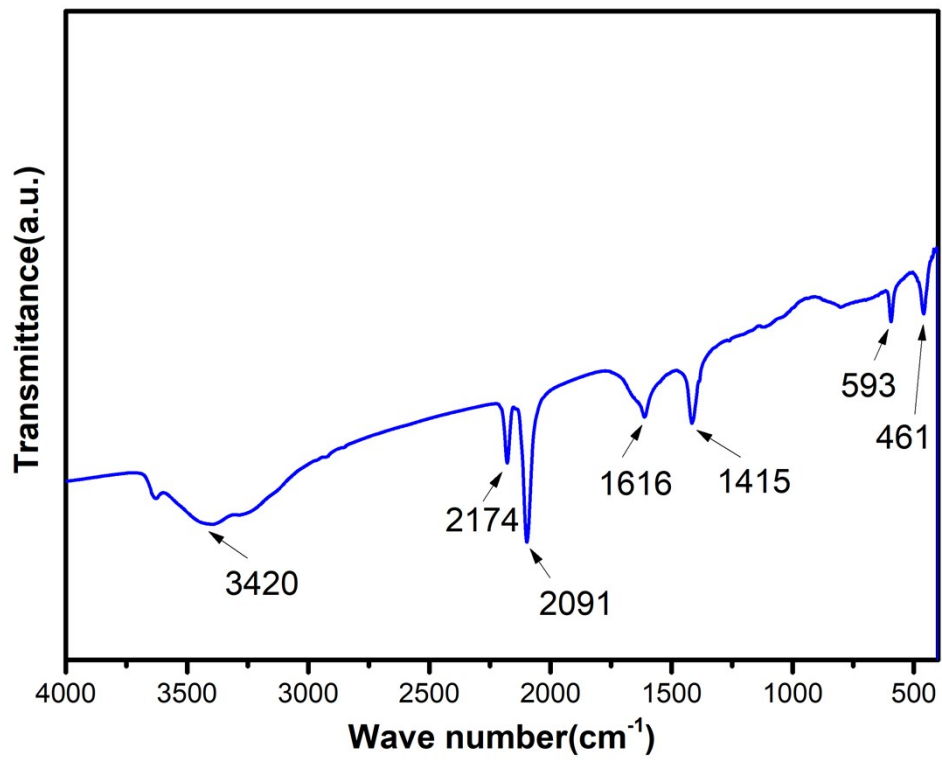

**Figure S4.** FT-IR spectrum of C-FeCoNi PBA@PDA.

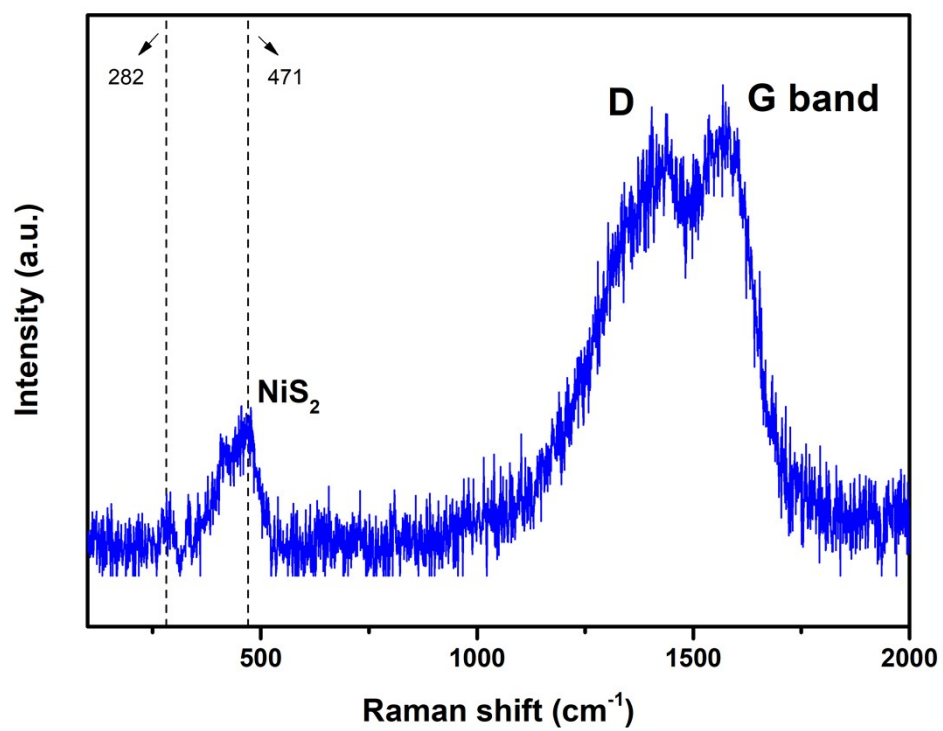

**Figure S5.** Raman spectrum of S-FeCoNi@C-CNB.

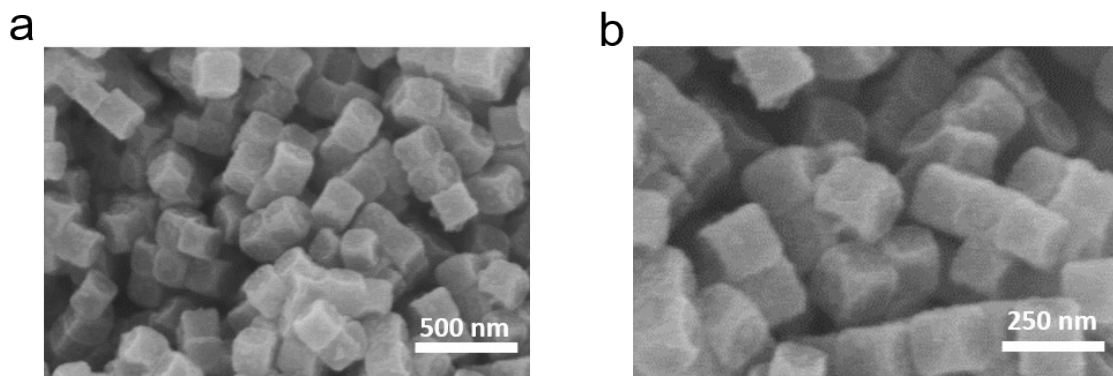

**Figure S6.** (a) Low and (b) high magnification SEM images of S-FeCoNi@CNB.

**Table S1.** Specific surface areas and specific pore volumes of characterized samples.

| <b>sample</b>               | <b>Specific surface area<br/>(m<sup>2</sup> g<sup>-1</sup>)</b> | <b>Total pore volume<br/>(cm<sup>3</sup> g<sup>-1</sup>)</b> | <b>t-plot micropore volume<br/>(cm<sup>3</sup> g<sup>-1</sup>)</b> |
|-----------------------------|-----------------------------------------------------------------|--------------------------------------------------------------|--------------------------------------------------------------------|
| <b>FeCoNi PBA</b>           | 26.8                                                            | 0.17                                                         | 0.0038                                                             |
| <b>C-FeCoNi PBA</b>         | 138                                                             | 0.22                                                         | 0.047                                                              |
| <b>C-FeCoNi<br/>PBA@PDA</b> | 120                                                             | 0.22                                                         | 0.034                                                              |
| <b>S-FeCoNi@C-<br/>CNB</b>  | 96.1                                                            | 0.34                                                         | 0.0041                                                             |
| <b>S-FeCoNi@CNB</b>         | 49.4                                                            | 0.13                                                         | 0.0016                                                             |



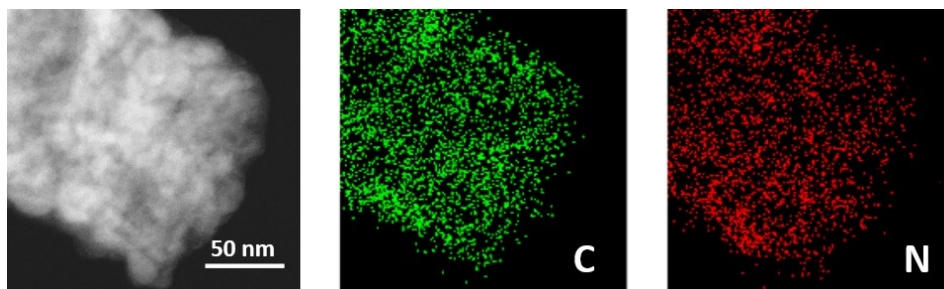

**Figure S7.** TEM-EDS elemental mapping of C and N in S-FeCoNi@C-CNB.

**Table S2.** Atomic percentages of constituent elements of S-FeCoNi@C-CNB determined with TEM-EDS and ICP-OES.

| <b>Atomic %</b> | <b>TEM-EDS</b> | <b>ICP-OES</b> |
|-----------------|----------------|----------------|
| <b>Fe</b>       | 3.03           | 7.1            |
| <b>Co</b>       | 2.26           | 6.9            |
| <b>Ni</b>       | 7.22           | 19.9           |
| <b>S</b>        | 26.1           | 65.9           |
| <b>C</b>        | 33.3           | --             |
| <b>N</b>        | 20.9           | --             |
| <b>O</b>        | 7.18           | --             |

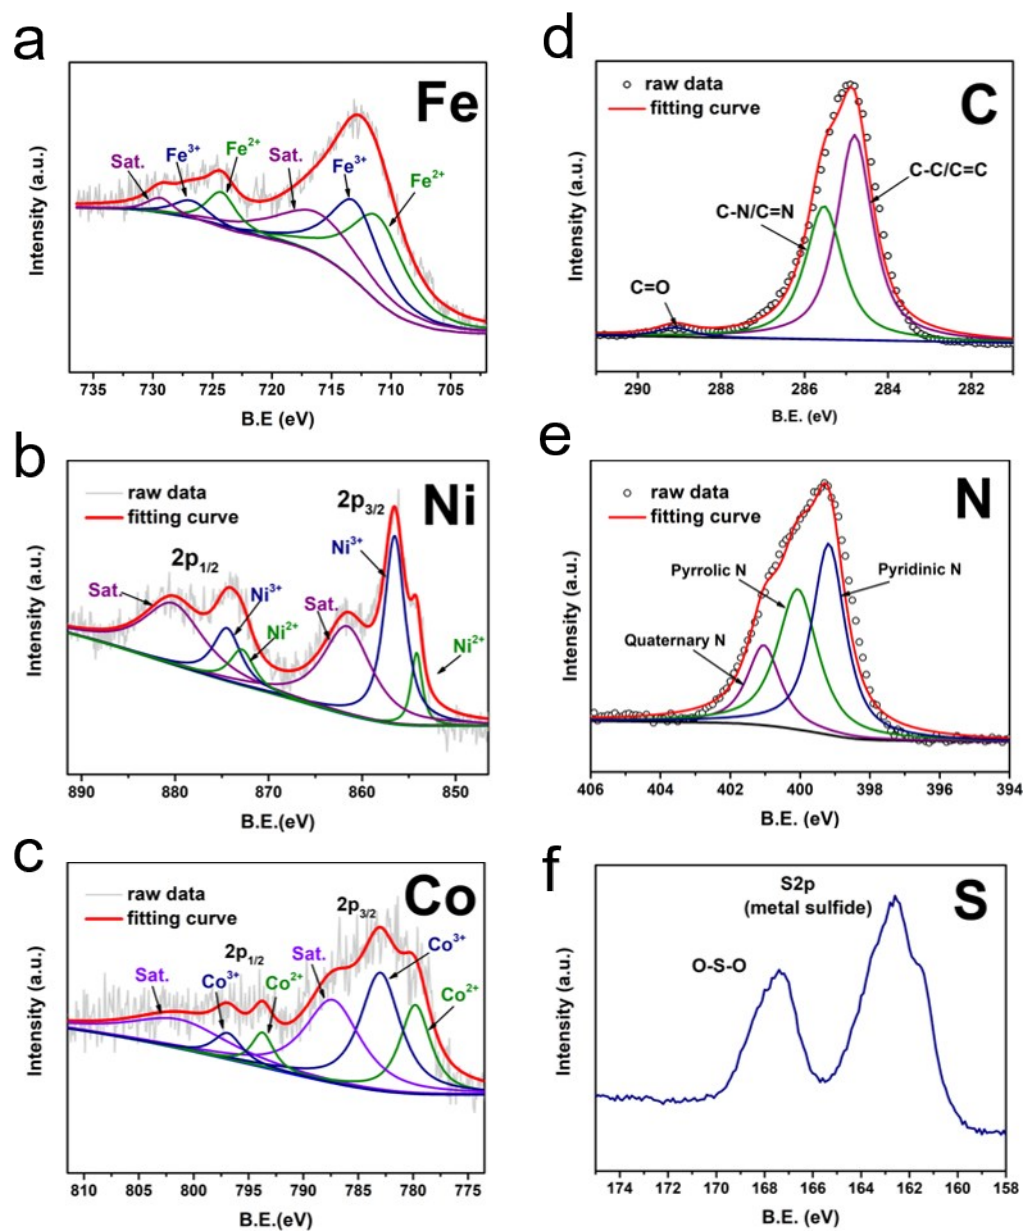

Figure S8. HRXPS patterns of (a) Fe, (b) Ni, (c) Co, (d) C, (e) N, and (f) S.

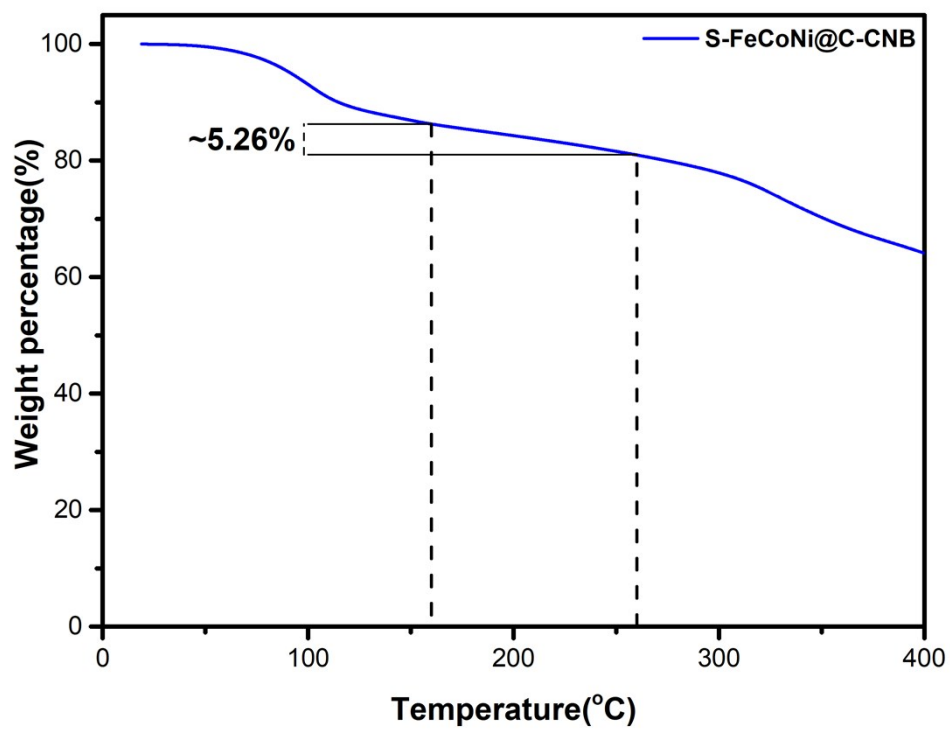

**Figure S9.** TG analysis of S-FeCoNi@C-CNB.

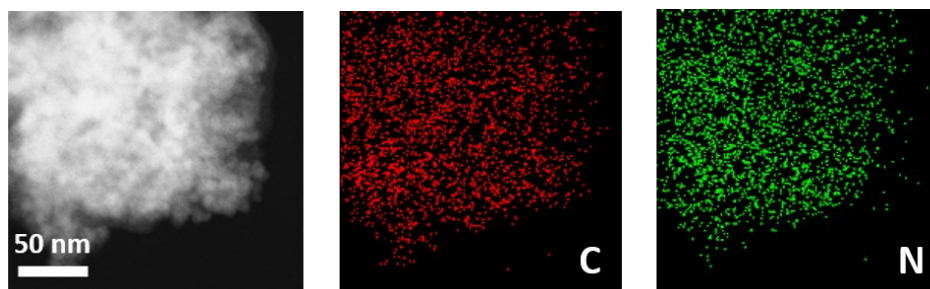

**Figure S10.** TEM-EDS elemental mapping of C and N in S-FeCoNi@C-CNB/S.

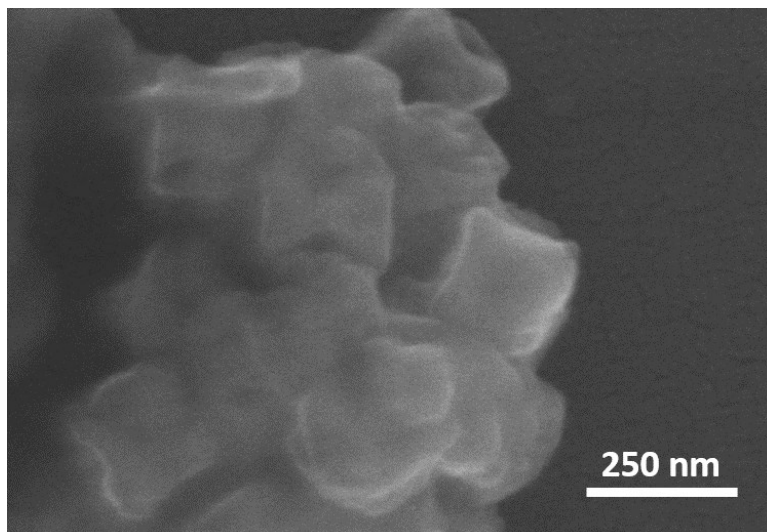

**Figure S11.** SEM image of S-FeCoNi@C-CNB/S after stability test.

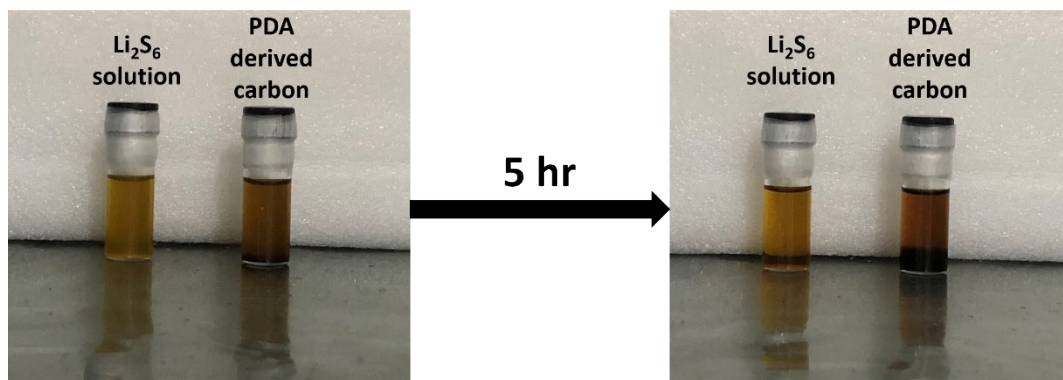

**Figure S12.** Results of LiPS adsorption test of PDA derived carbons.

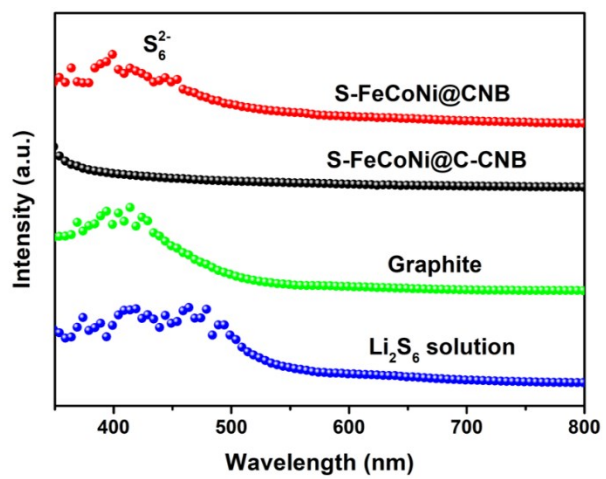

**Figure S13.** UV-visible spectroscopy of  $\text{Li}_2\text{S}_6$  solutions after adsorption tests.



**Table S3.** Lithium ion diffusion coefficients of S-FeCoNi@C-CNB/S and S-FeCoNi@CNB/S determined based on in different reaction.

| <b>sample</b>         | <b>Peak B'</b><br><b>(m<sup>2</sup> s<sup>-1</sup>)</b> | <b>Peak B</b><br><b>(m<sup>2</sup> s<sup>-1</sup>)</b> |
|-----------------------|---------------------------------------------------------|--------------------------------------------------------|
| <b>S-FeCoNi@C-CNB</b> | $1.4 \times 10^{-13} \sim 1.1 \times 10^{-14}$          | $1.5 \times 10^{-13} \sim 1.2 \times 10^{-14}$         |
| <b>S-FeCoNi@CNB</b>   | $9.0 \times 10^{-14} \sim 7.1 \times 10^{-15}$          | $4.0 \times 10^{-14} \sim 3.2 \times 10^{-15}$         |

**Table S4.** Electrochemical energy storage performances of S-FeCoNi@C-CNB/S vs. recently reported state-of-the-art cathodes of LSBs.

| reference        | material                                         | maximum capacity (mAh/g) | maximum C rate       | cycle number     | capacity decay rate (% per cycle) | sulfur content (wt%) | ratio of electrolyte to sulfur ( $\mu\text{L}/\text{mg}$ ) |
|------------------|--------------------------------------------------|--------------------------|----------------------|------------------|-----------------------------------|----------------------|------------------------------------------------------------|
| <b>This work</b> | <b>S-FeCoNi @C-CNB/S</b>                         | <b>1238 (0.1 C)</b>      | <b>2 (655 mAh/g)</b> | <b>200 (1 C)</b> | <b>0.049</b>                      | <b>75</b>            | <b>36</b>                                                  |
| [S1]             | ZIF-67-S-PPy-60%                                 | ~990 (0.1 C)             | 1 (~410 mAh/g)       | 200 (0.1 C)      | ~0.3                              | 54                   | 26~63                                                      |
| [S2]             | flower-like CoSP                                 | 1225 (0.1 C)             | 2 (606 mAh/g)        | 900 (1 C)        | 0.046                             | 73                   | 18                                                         |
| [S3]             | NiCo <sub>2</sub> S <sub>4</sub> @CN Ts/S        | 780 (0.6 C)              | 3 (530 mAh/g)        | >1000 (0.6C)     | 0.049                             | 66                   | N/A                                                        |
| [S4]             | HKUST-1                                          | 1377 (0.05 C)            | 0.6 (541 mAh/g)      | 300 (0.2 C)      | 0.06                              | N/A                  | N/A                                                        |
| [S5]             | S/NiS@CHS                                        | 1196 (0.1 C)             | 2 (674 mAh/g)        | 300 (0.5 C)      | 0.013                             | 73.7                 | 20                                                         |
| [S6]             | Co <sub>9</sub> S <sub>8</sub> @N-CNTs           | 1016 (0.1 C)             | 2 (543 mAh/g)        | 300 (0.5 C)      | 0.1                               | 75                   | N/A                                                        |
| [S7]             | NC/MoS <sub>3</sub> -S                           | 1267 (0.1 C)             | 3 (597 mAh/g)        | 500 (0.5 C)      | 0.076                             | 70                   | 15                                                         |
| [S8]             | CFS-2/CP                                         | 1500 (0.1 C)             | 1 (790 mAh/g)        | 400 (0.2 C)      | 0.11                              | 70                   | 24                                                         |
| [S9]             | S@Na <sub>2</sub> Fe[Fe(CN) <sub>6</sub> ]@PEDOT | 1147 (0.2 C)             | 5 (683 mAh/g)        | 200 (2 C)        | 0.1                               | 82                   | N/A                                                        |
| [S10]            | S@S-ZIF-8@CNTs                                   | 1480 (0.05 C)            | 1 (840 mAh/g)        | 500 (0.1 C)      | 0.08                              | 64                   | N/A                                                        |

## References:

- [S1] P. Geng, S. Cao, X. Guo, J. Ding, S. Zhang, M. Zheng, H. Pang, Polypyrrole coated hollow metal–organic framework composites for lithium–sulfur batteries, *Journal of Materials Chemistry A* 7 (2019) 19465-19470.
- [S2] X. Chen, X. Ding, H. Muheiyati, Z. Feng, L. Xu, W. Ge, Y. Qian, Hierarchical flower-like cobalt phosphosulfide derived from Prussian blue analogue as an efficient polysulfides adsorbent for long-life lithium-sulfur batteries, *Nano Research* 12 (2019) 1115-1120.
- [S3] X. Lu, Q. Zhang, J. Wang, S. Chen, J. Ge, Z. Liu, L. Wang, H. Ding, D. Gong, H. Yang, High performance bimetal sulfides for lithium-sulfur batteries, *Chemical Engineering Journal* 358 (2019) 955-961.
- [S4] B. Liu, R. Bo, M. Taheri, I. Di Bernardo, N. Motta, H. Chen, T. Tsuzuki, G. Yu, A. Tricoli, Metal–Organic Frameworks/Conducting Polymer Hydrogel Integrated Three-Dimensional Free-Standing Monoliths as Ultrahigh Loading Li–S Battery Electrodes, *Nano letters* 19 (2019) 4391-4399.
- [S5] C. Ye, L. Zhang, C. Guo, D. Li, A. Vasileff, H. Wang, S.Z. Qiao, A 3D hybrid of chemically coupled nickel sulfide and hollow carbon spheres for high performance lithium–sulfur batteries, *Advanced Functional Materials* 27 (2017) 1702524.
- [S6] Y. Xi, N. Angulakshmi, B. Zhang, X. Tian, Z. Tang, P. Xie, G.Z. Chen, Y. Zhou, A Co<sub>9</sub>S<sub>8</sub> microsphere and N-doped carbon nanotube composite host material for lithium-sulfur batteries, *Journal of Alloys and Compounds* 826 (2020) 154201.
- [S7] L. Guo, J. Yu, J. Xiao, A. Li, Z. Yang, L. Zeng, Q. Zhang, Y. Zhu, Enhanced Multiple Anchoring and Catalytic Conversion of Polysulfides by Amorphous MoS<sub>3</sub> Nanoboxes for High-Performance Li-S Batteries, *Angewandte Chemie International Edition* (2020).
- [S8] Y. Huang, D. Lv, Z. Zhang, Y. Ding, F. Lai, Q. Wu, H. Wang, Q. Li, Y. Cai, Z. Ma, Co-Fe Bimetallic sulfide with Strengthened Chemical Adsorption and Catalytic Activity for Polysulfides in Lithium-Sulfur Batteries, *Chemical Engineering Journal* (2020) 124122.
- [S9] D. Su, M. Cortie, H. Fan, G. Wang, Prussian Blue Nanocubes with an Open Framework Structure Coated with PEDOT as High-Capacity Cathodes for Lithium–Sulfur Batteries, *Advanced Materials* 29 (2017) 1700587.
- [S10] H. Zhang, W. Zhao, M. Zou, Y. Wang, Y. Chen, L. Xu, H. Wu, A. Cao, 3D, Mutually embedded MOF@ carbon nanotube hybrid networks for high-performance lithium-sulfur batteries, *Advanced Energy Materials* 8 (2018) 1800013.
